# Supplementary material for: Odorant Binding Causes Cytoskeletal Rearrangement, Leading to Detectable Changes in Endothelial and Epithelial Barrier Function and Micromotion
Source: MDPI journal article supplement (doi:10.3390/bios13030329), 2023-02-28
Supplement: s1 [file s1]

Supplementary Materials

# Odorant Binding Causes Cytoskeletal Rearrangement, Leading to Detectable Changes in Endothelial and Epithelial Barrier Function and Micromotion

Theresa M. Curtis <sup>1,\*</sup>, Annabella M. Nilon <sup>1</sup>, Anthony J. Greenberg <sup>2</sup>, Matthew Besner <sup>1</sup>, Jacob J. Scibek <sup>1</sup>, Jennifer A. Nichols <sup>3</sup> and Janet L. Huie <sup>3</sup>

<sup>1</sup> Department of Biological Sciences, SUNY Cortland, Cortland, NY 13045, USA

<sup>2</sup> Bayesic Research, LLC, Ithaca, NY 14850, USA

<sup>3</sup> Jan Biotech, Inc., Ithaca, NY 14850, USA

\* Correspondence: [theresa.curtis@cortland.edu](mailto:theresa.curtis@cortland.edu)

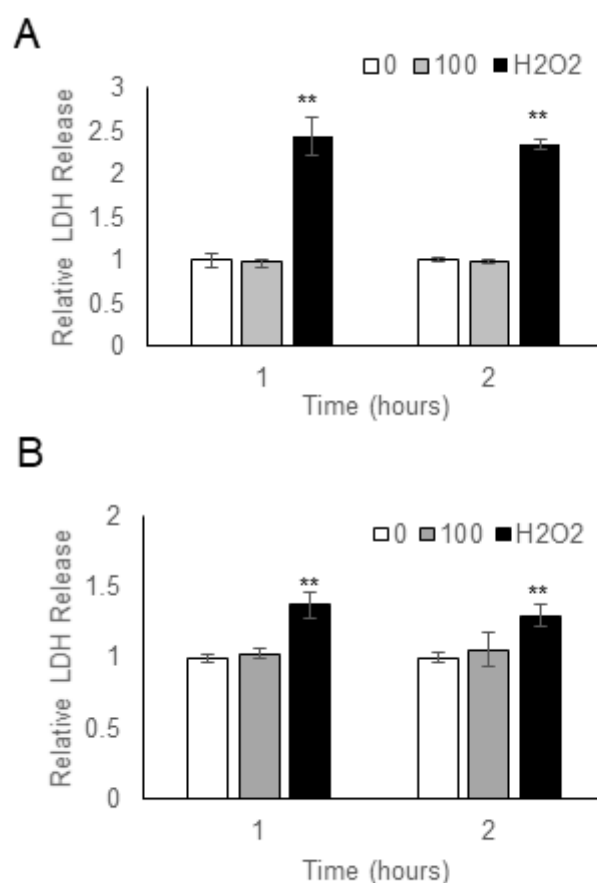

**Figure S1.** Odorant exposure does not decrease HUVEC or HaCaT cell viability. **(A)** HUVECs were exposed to 100  $\mu$ M lylral or 4  $\mu$ M hydrogen peroxide (positive control) for 1 or 2 hours, and lactate dehydrogenase (LDH) release was assayed. **(B)** HaCaT cells were exposed to 100  $\mu$ M Sandalore or 4  $\mu$ M hydrogen peroxide (positive control) for 1 or 2 hours, and lactate dehydrogenase (LDH) release was assayed. Data represented as mean  $\pm$  SEM of three independent experiments. A two-tailed *t*-test was performed to compare each treated group to control; \*\* *p* < 0.01 as indicated.

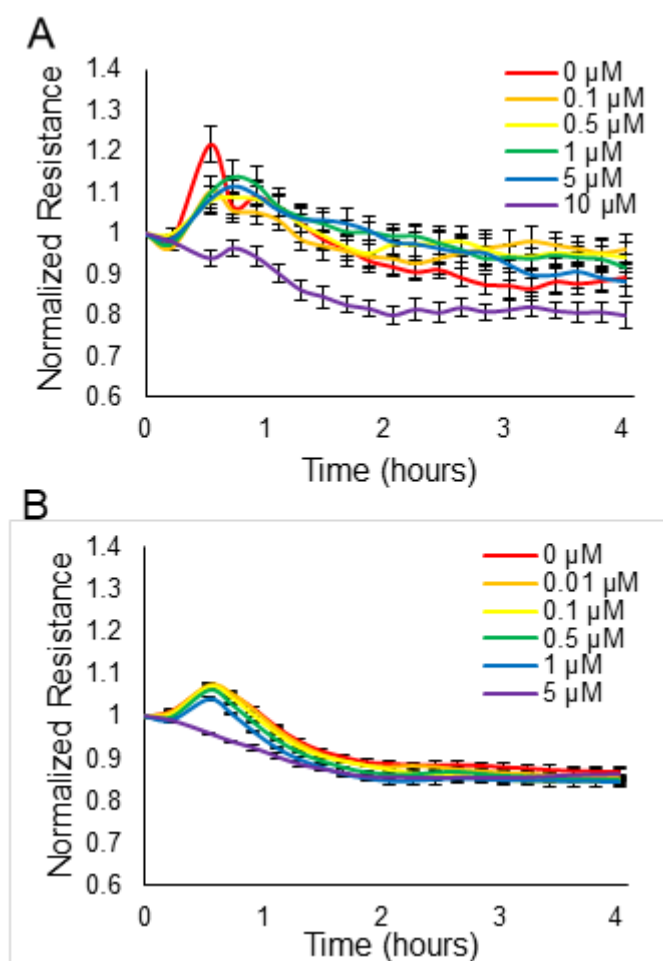

**Figure S2.** Low dose odorant exposures. **(A)** HUVEC monolayers were exposed to different concentrations of lyral (0.1–10  $\mu\text{M}$ ) and resistance was monitored over a 4 h period. **(B)** HaCaT monolayers were exposed to different concentrations of Sandalore (0.01–5  $\mu\text{M}$ ) and resistance was monitored over a 4 h period. Data represented as mean  $\pm$  SEM of one independent experiment representative of three experimental repeats.
